# Supplementary material for: Tight junction protein occludin is an internalization factor for SARS-CoV-2 infection and mediates virus cell-to-cell transmission
Source: PubMed Central journal article supplement (PMC10151465; doi:10.1073/pnas.2218623120), 2023-04-17
Supplement: pnas.2218623120.sapp.pdf [file pnas.2218623120.sapp.pdf]

4 **Supporting Information for**

8 **Tight junction protein occludin is an internalization factor for SARS-CoV-2**  
9 **infection and mediates virus cell-to-cell transmission**

11 Jialin Zhang<sup>a,b</sup>, Wenyu Yang<sup>a,b</sup>, Sawrab Roy<sup>a,b</sup>, Heidi Liu<sup>a,b</sup>, R. Michael Roberts<sup>c,d</sup>, Liping Wang<sup>a,b</sup>,  
12 Lei Shi<sup>a,b</sup>, Wenjun Ma<sup>a,b,\*</sup>

16 \*To whom correspondence should be addressed: Wenjun Ma

17 Email: [wma@missouri.edu](mailto:wma@missouri.edu)

20 **This PDF file includes:**

22 Supporting text  
23 Figures S1 to S5  
24 SI References

## 34 **Supplementary Materials and Methods**

### 35 **Cell lines**

36 Vero-E6 cells (ATCC, CRL-1586), Caco-2 cells (kindly provided by Dr. Feng Li at University of  
37 Kentucky), and BSR-T7/5 cells (kindly provided by Dr. Karl-Klaus Conzelmann) were cultured in  
38 Dulbecco's modified Eagle's medium (DMEM) supplemented with 10% fetal bovine serum (FBS)  
39 and 1% penicillin/streptomycin at 37°C in a 5% CO<sub>2</sub> incubator. 293FT cells expressing human  
40 ACE2 and Transmembrane Serine Protease 2 (TMPRSS2) (293FT-hACE2-TMRPSS2) (a kind gift  
41 from Dr. Marc Johnson at University of Missouri-Columbia) were maintained in DMEM  
42 supplemented with 10% FBS, MEM vitamin, L-glutamine, sodium pyruvate, non-essential amino  
43 acids and selected with puromycin (1 µg/mL) and hygromycin (200 µg/mL) (1). A549-hACE2 cell  
44 line expressing human ACE2 was maintained in DMEM supplemented with 10% FBS and selected  
45 with 0.5 µg/mL of puromycin (InvivoGen, a549-hace2)

### 46 **Viruses**

47 SARS-CoV-2 reverse genetic system was kindly provided by Dr. Pei-Yong Shi at University of  
48 Texas Medical Branch. SARS-CoV-2-mNG virus expressing the mNeonGreen gene was rescued  
49 on Vero-E6 cells in a BSL-3 facility according to an appropriate protocol (2). The SARS-CoV-2  
50 USA-WA1/2020 strain was acquired from BEI Resources (Manassas, VA, USA) and kindly  
51 provided by Drs. Jeff Adamovicz and Jeff Whyte at University of Missouri. Plasmids encoding  
52 codon-optimized full-length Spike of the Wuhan-1 strain (VRC7480), Alpha (B.1.1.7), Beta  
53 (B.1.351), Gamma (P.1), Delta (B.1.617.2), Kappa (B.1.617.1) and Omicron (BA.2) were kindly  
54 provided by Dr. Tongqing Zhou at the Vaccine Research Center, NIAID/NIH. Vesicular stomatitis  
55 virus (VSV) reverse genetic system was kindly provided by Dr. Sean Whelan at Washington  
56 University in St. Louis. rVSV-eGFP-SARS-CoV-2-S virus (rVSV-eGFP-S) was rescued on BSR-  
57 T7/5 cells and passaged on Vero-E6 cells. Recovery of the rVSV-eGFP-S virus was performed as  
58 described previously (3). Briefly, BSR-T7/5 cells in a 6-well plate were infected with the vaccinia  
59 virus MVA-T7 (kindly provided by Dr. Bernard Moss at NIH) at 37°C for 1 h and subsequently  
60 transfected with 7 µg of mixed plasmids of VSV-eGFP-SARS-CoV-2, N, P, and L with a 5:3:5:1  
61 ratio. Forty-eight hours posttransfection, the supernatants were filtered to remove the vaccinia virus  
62 and passaged on Vero-E6 cells. SARS-CoV-2-mNG and rVSV-eGFP-S virus stocks were prepared  
63 and titrated on Vero-E6 cells and stored at -80°C. The PEDV strain was isolated from pigs by Dr.  
64 Ma's laboratory in 2013.

### 65 **Hamster study**

66  
67  
68 Nine 6 to 8-weeks-old male and female Syrian hamsters were divided into 2 groups and held in the  
69 BSL3 animal facility at the University of Missouri Laboratory for Infectious Disease Research. Six  
70 hamsters were intranasally infected with 10<sup>6</sup> TCID<sub>50</sub> of the SARS-CoV-2/USA-WA1/2020 virus per  
71 animal and 3 hamsters were mock-infected with PBS as controls. Clinical signs were monitored  
72 daily. Three infected and control hamsters were euthanized and necropsied on day 3 postinfection  
73 and the remaining 3 infected hamsters were necropsied on day 5 postinfection. During necropsy,  
74 the lung was collected from each animal for western blot assay to determine levels of OCLN.

### 75 **Plasmids**

76 SARS-CoV-2 S1 subdomain (aa 14-685) was amplified and cloned into pCAGGS vector with a HA  
77 tag or a His tag in the C-terminal to generate pCAGGS-S1-HA or pCAGGS-S1-His plasmid. The  
78 human OCLN (hOCLN) gene was amplified from RNA of 293T cells and cloned into pCAGGS  
79 vector with a Flag tag in the C-terminal or pCold-GST vector (Takara, 3372), resulting in pCAGGS-  
80 hOCLN-flag and pCold-GST-hOCLN plasmids. The hOCLN gene was cloned into pLenti-CMV/TO-  
81 eGFP-Puro plasmid by using BamHI/XbaI to generate the lentiviral plasmid pLenti-CMV/TO-  
82 hOCLN-Puro to overexpress OCLN on Vero-E6 cells or A549-hACE2 cells. Mouse occludin  
83 (mOCLN) was amplified from RNA extracted from mouse lung tissue and cloned into pCAGGS  
84 vector with a Flag tag in the C-terminal to generate a plasmid, named the pCAGGS-mOCLN-Flag.  
85 hOCLN/ΔN (deletion of aa 1-63), hOCLN/ΔC (deletion of aa 267-522), hOCLN/ΔEL1 (deletion of  
86 aa 94-128), and hOCLN/ΔEL2 (deletion of aa 200-238) as described previously (4) were amplified  
87 by using overlap-PCR and cloned into pCAGGS vector with a Flag tag in the C-terminal to generate  
88

89 pCAGGS-hOCLN/ $\Delta$ N-Flag, pCAGGS-hOCLN/ $\Delta$ C-Flag, pCAGGS-hOCLN/ $\Delta$ EL1-Flag, and  
90 pCAGGS-hOCLN/ $\Delta$ EL2-Flag plasmids, respectively.

91

## 92 **OCLN knockout cell line**

93 The guide sequence oligonucleotides including the BsmBI restriction site overhangs (gRNA1: 5'-  
94 CACCGAGTGTAGGCTACCCTTATGG-3', 5'-AAACCCATAAGGGTAGCCTACTACTC-3'; gRNA2:  
95 5'-CACCGGATAATAGTGAGCGCTATCC-3', 5'-AAACGGATAGCGCTCACTATTATCC-3') were  
96 designed and cloned into the lentiCRISPRv2-blast vector (Addgene, 98293) to generate  
97 lentiCRISPRv2-blast-gRNA. 293T cells in 100-mm dishes were transfected with plasmids using  
98 Lipofectamine 3000 according to the manufacturer's instructions to prepare lentivirus. Briefly, 10  
99  $\mu$ g of lentiCRISPRv2-blast-gRNA, 8  $\mu$ g of psPAX2 (Addgene, 12260), and 5  $\mu$ g of pCMV-VSV-G  
100 (Addgene, 8454) were transfected into 293T cells. The medium was changed at 6 h  
101 posttransfection and at 48 h the supernatant was collected, filtered through a 0.45  $\mu$ m PES filter,  
102 and concentrated with Amicon Ultra-4 centrifugal filters. Vero-E6 cells in 6-well plates were infected  
103 with the concentrated lentivirus at 37°C for 6 h. Then, the virus was removed, and 2 ml of fresh  
104 medium was added. After 48 h of incubation, the medium was replaced with the selective medium  
105 containing 6  $\mu$ g/ml of Blasticidin S HCl (ThermoFisher, A1113903). After 7 days of selection, cells  
106 were subjected to single-clone selection using serial dilutions in a 96-well plate. After 3 days of  
107 incubation, wells containing single cells were marked and knockout cells were identified by the  
108 Guide-it Genotype Confirmation Kit (Takara, 632611), and further confirmed by IFA and western  
109 blot. Positive colonies were transferred into 6-well plates for amplification and further experiments.

110

111

## 111 **Confocal assay**

112 Vero-E6 cells in a 35-mm glass dish were infected with SARS-CoV-2-mNG or rVSV-eGFP-S virus  
113 at an MOI of 0.1. The cells were then fixed with 4% paraformaldehyde for 20 mins and  
114 permeabilized with 0.25% Triton X-100 for 15 min followed by blocking with 5% non-fat milk for 1 h  
115 at room temperature. Rabbit anti-OCLN antibody (1:200, Invitrogen, 71-1500), mouse anti-ZO-1  
116 antibody (1:250, Invitrogen, 339100), rabbit anti-claudin antibody (1:1000, Abcam, ab211737) were  
117 added and incubated at 4°C overnight, followed by incubating with an Alexa Fluor™ 647-  
118 conjugated goat anti-rabbit IgG (H+L) cross-adsorbed secondary antibody (A-21244, Invitrogen) or  
119 an Alexa Fluor™ 647-conjugated goat anti-mouse IgG (H+L) cross-adsorbed secondary antibody  
120 (A-21235, Invitrogen) at 37°C for 1 h, respectively. Nuclei were stained with 4',6-diamidino-2-  
121 phenylindole (DAPI).

122 For the ACE2 and OCLN colocalization assay, Vero-E6 cells were infected with SARS-CoV-2/WA1  
123 strain at an MOI of 0.1, and then fixed with methanol/acetone (3:2) at -20°C for 30 min. After  
124 blocking with 5% non-fat milk, the cells were incubated with a mouse anti-ACE2 antibody (1:200,  
125 Invitrogen, MA5-31395) or a rabbit anti-occludin antibody (1:200, Invitrogen, 71-1500) at 4°C  
126 overnight, followed by exposure to secondary antibodies as described above. Images were  
127 captured with a Leica SP8 spectral confocal microscope.

128

129

## 129 **Immunofluorescence assay**

130 Vero-E6 cells in 24-well plates were infected with the SARS-CoV-2-mNG virus at an MOI of 0.01  
131 at 37°C for 1 h. Then, the cells were washed three times with PBS and fresh DMEM with 2% FBS  
132 was added. After 48 h, the cells were fixed with methanol/acetone (3:2) at -20°C for 30 min and  
133 non-specific antibody binding blocked with 2% BSA for 2 h at room temperature. The cells were  
134 stained with an OCLN monoclonal antibody diluted 1:250 in 0.1% BSA (Invitrogen, 33-1500) at 4°C  
135 overnight, and then stained with the Alexa Fluor 594-conjugated goat anti-mouse IgG (H+L) at a  
136 dilution of 1:500 (Jackson ImmunoResearch Laboratories, 115-585-003) at 37°C for 2 h.

137 For the siRNA assays, the cells were stained with ZO-1 (1:250, Invitrogen, 339100) or Claudin-1  
138 (1:1000, Abcam, ab211737) antibody after fixation and blocking at 4°C overnight, followed by  
139 incubating with an Alexa Fluor 594-conjugated goat anti-mouse IgG (H+L) (Jackson  
140 ImmunoResearch Laboratories, 115-585-003) and Alexa Fluor Plus 594 labeled goat anti-rabbit  
141 IgG (H+L) antibody at 37°C for 2 h, respectively. Nuclei were stained with DAPI. Images were  
142 acquired with the EVOS™ M5000 imaging system.

143

144

## 144 **Western blot assay**

145 Vero-E6 cells were infected with SARS-CoV-2 at an MOI of 0.01. Cells were harvested at indicated  
146 time points (24 h and 48 h) and lysed with RIPA on ice for 30 min. Lungs were collected from three  
147 mock-infected hamsters at day 3 postinfection and three hamsters infected with the SARS-CoV-  
148 2/WA1 virus at day 3 and 5 postinfection, respectively, for the western blot assay. Lung tissues  
149 (100 mg) from each animal were mixed with 1 ml CellLytic™ M buffer (C2978, Sigma-Aldrich)  
150 containing protease inhibitors and homogenized. The supernatant was collected after  
151 centrifugation at 12,000 × g for 30 min. The supernatants were mixed with 4 X loading buffer and  
152 boiled for 20 mins to prepare samples for electrophoresis on a 10% SDS-PAGE gel. After  
153 transferring protein to the PVDF membrane, the membrane was blocked with 5% non-fat milk in  
154 PBS for 1 h at room temperature. Then, the membrane was incubated with an OCLN monoclonal  
155 antibody (1:1,000, Invitrogen, 33-1500), an anti-SARS-CoV-2-nucleocapsid (N) rabbit monoclonal  
156 antibody (1:2,000, Genuin Biotech LLC, VYN7), and an anti-GAPDH mouse monoclonal antibody  
157 (1:1,000, Santa Cruz, sc-166545) at 4°C overnight, followed by incubation of the HRP-conjugated  
158 goat anti-rabbit IgG (H+L) (1:10,000, Invitrogen, A16096) or HRP-conjugated goat anti-mouse IgG  
159 (H+L) (1:10,000, Invitrogen, A16066) for 1 h at room temperature. Chemiluminescent detection  
160 was performed by using Pierce™ ECL Western blot Substrate (Thermo Scientific, 32106).

161  
162

### RT-qPCR

163 The OCLN mRNA level was determined after SARS-CoV-2 infection. The cellular RNA was  
164 prepared and extracted with 1 mL TRIzol (Invitrogen, 15596026) according to the manufacturer's  
165 instructions. RT-qPCR was performed by using Invitrogen™ SuperScript™ III Platinum™ SYBR™  
166 Green One-Step RT-qPCR Kit (Invitrogen, 11-736-051) according to the manufacturer's  
167 instructions under the following conditions: reverse transcription (50°C for 5 min; 95°C for 2 min)  
168 for one cycle; PCR (95°C for 3 s; 60°C for 30 s) for 40 cycles with a CFX96 Touch Real-Time PCR  
169 System (Bio-Rad). Primers targeting green monkey OCLN gene and human OCLN gene were  
170 monkey OCLN-F: GACTTCAGGCAGCCTCGTTAC; monkey OCLN-R:  
171 GCCAGTTGTGTAGTCTGTTTCA; and human OCLN-F: ACTTCAGGCAGCCTCGTTAC; human  
172 OCLN-R: GCCAGTTGTGTAGTCTGTCTCA. Primers for monkey β-actin, human ACE2 and  
173 human 28S rRNA genes were used as described previously (5). Primers targeting green monkey  
174 ACE2 gene were monkey ACE2-F: TGGGACTCTGCCATTTACTTAC; and monkey ACE2-R:  
175 CCCAACTATCTCTCGCTTCATC. Primers (2019-nCoV\_N2-F/2019-nCoV\_N2-R) and probe  
176 (2019-nCoV\_N2-P) targeting SARS-CoV-2 N were used as CDC recommended to detect viral RNA  
177 (<https://www.cdc.gov/coronavirus/2019-ncov/lab/rt-pcr-panel-primer-probes.html>). RT-qPCR was  
178 performed by using qScript® XLT One-Step RT-qPCR ToughMix® (Quantabio, 95132-02K)  
179 according to the manufacturer's instructions under the following conditions with some  
180 modifications: reverse transcription (50°C for 10 min; 95°C for 3 min) for one cycle; PCR (95°C for  
181 3 s; 55°C for 30 s) for 45 cycles with a CFX96 Touch Real-Time PCR System (Bio-Rad). Relative  
182 quantification was performed by the cycle threshold ( $\Delta\Delta Ct$ ) method.

183  
184

### Co-immunoprecipitation

185 293T cells were co-transfected with pCAGGS-SARS-CoV-2-S1-HA, pCAGGS-hACE2-HA, and  
186 pCAGGS-OCLN-flag, or pCAGGS empty vector using lipofectamine 3000 (Invitrogen, L3000075)  
187 according to the manufacturer's instructions. Seventy-two hours posttransfection, the cells were  
188 washed three times with cold PBS and lysed with Pierce™ IP Lysis Buffer (Thermo Scientific,  
189 87787) on ice for 30 min. The supernatant was collected and mixed with 25 μl of pre-washed  
190 Pierce™ Protein G Magnetic Beads (Thermo Scientific, 88848) for 4 h at 4°C on a tube revolver  
191 rotator (Thermo Scientific, 11676341). The beads were removed with a magnetic stand and an anti-  
192 HA antibody (Abcam, ab9110) was added to the supernatant and incubated overnight at 4°C. Pre-  
193 washed Protein G Magnetic Beads (25 μl) were added to the sample and incubated at 4°C for 4-6  
194 h. After five times washing with cold TBST, the magnetic beads were mixed with the loading buffer  
195 and boiled for 15 min to prepare the sample for SDS-PAGE.

196  
197

### GST pull-down assay

198 293T cells were transfected with the pCAGGS-S1-His plasmid. At 60 h post-transfection, cells and  
199 supernatant were collected, and S1 protein was purified with a His tag by using ProBond  
200 Purification System (ThermoFisher, K850-01). pCold-GST-hOCLN and pCold-GST empty plasmids

201 were transformed into *E. coli* BL21 (DE3) competent cells and induced with IPTG, respectively.  
202 GST and GST-tagged hOCLN were purified by glutathione agarose according to the manufacturer's  
203 instructions. In brief, IPTG-induced bacteria cultures were harvested and resuspended with cold  
204 PBS, followed by mild sonication on ice. The supernatant containing soluble proteins were collected  
205 after centrifugation at 12,000 × *g* for 30 min, then mixed with the resin and incubated for 4 h at 4°C  
206 with purified SARS-CoV-2 S1 protein. The resin was washed five times with cold PBS and  
207 incubated at 4°C for 4 h with the lysates of the HEK293T cells transfected with pCAGGS-S1-His.  
208 After five times washing with cold PBS, the bound proteins were detected by western blot by using  
209 a mouse anti-His tag monoclonal antibody (1:1,000) and a GST Tag monoclonal antibody (1:1,000).  
210

#### 211 **Pharmacological inhibitors**

212 Vero-E6 cells were infected with rVSV-eGFP-S virus at an MOI of 0.01 for 1 h at 37°C. Then, the  
213 cells were washed three times with PBS, and the medium for the plaque assay containing 50 nM  
214 Bafilomycin (Baf-A1, Abcam, ab120497) or 5 μM Cathepsin L inhibitor III (Sigma, 219427-5mg)  
215 was overlaid onto the cells, respectively. After 48 h of incubation, the GFP signal was observed,  
216 and images were acquired with the EVOS™ M5000 imaging system. For virus entry assay, Vero-  
217 E6 cells were pre-treated with EIPA or rottlerin at 50 μM and 10 μM, respectively at 37°C for 1 h,  
218 then infected with SARS-CoV-2 at an MOI of 1 at 4°C for 1 h. The infected cells were washed three  
219 times with cold PBS to remove unbound viruses. The plate was transferred to 37°C for 1 h to allow  
220 virus entry. The bound viruses were then removed by washing three times with acidic buffer (50  
221 mM glycine, 100 mM NaCl, pH 3.0), and trypsinized to remove SARS-CoV-2. Viral RNA was  
222 detected by RT-qPCR targeting the N gene after RNA was extracted with 1 ml TRIzol.  
223

#### 224 **Statistical analysis**

225 Data were analyzed by using a Student's *t* test, and values are indicated with mean ± SD. All data  
226 are representative of at least three independent experiments. Data analysis was performed with  
227 the GraphPad PRISM 9 software (ns,  $p > 0.05$ ; \*\*\*\* $p < 0.0001$ ; \*\*\* $p < 0.001$ ; \*\* $p < 0.01$ ; \* $p < 0.05$ ).

228  
229  
230

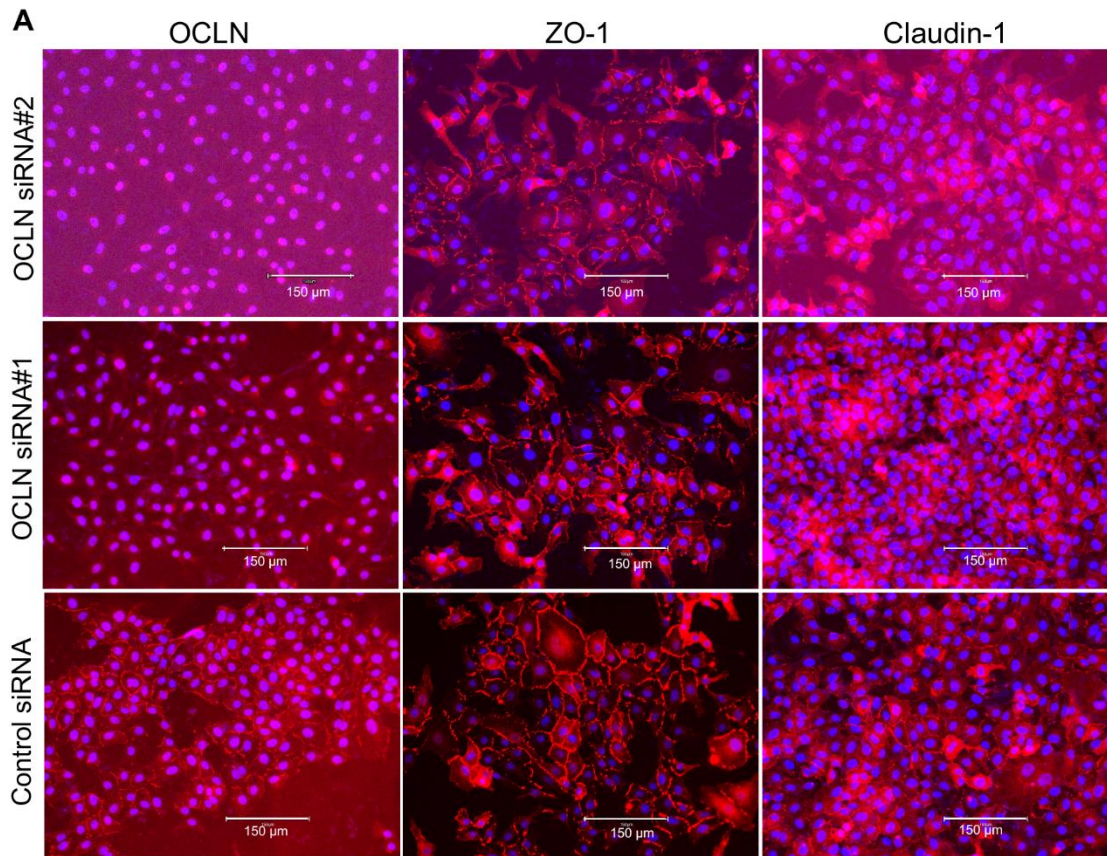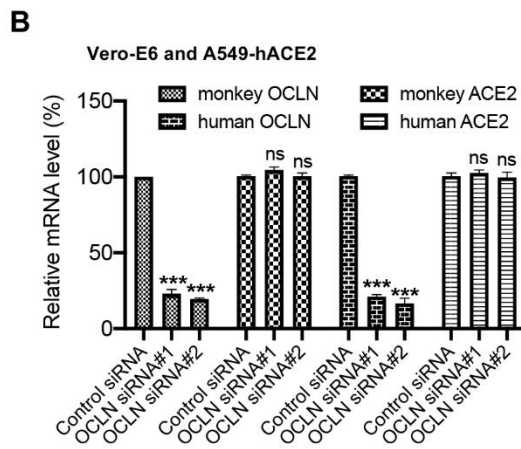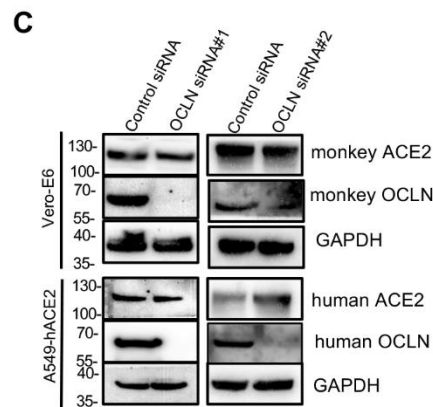

232  
233  
234  
235  
236  
237  
238  
239

**Fig. S1. OCLN knockdown has no effect on ACE2 expression.** (A) Vero-E6 cells were transfected with two OCLN-specific siRNAs for 72 h, and IFA was performed to detect OCLN, ZO-1 and Claudin-1 expression (scale bars, 150 μm). (B) RT-qPCR was used to determine OCLN and ACE2 mRNA level after siRNAs treatment for 72 h. The results were representative of three independent experiments. (C) Western blot was used to determine OCLN and ACE2 expression after siRNAs treatment for 72 h.

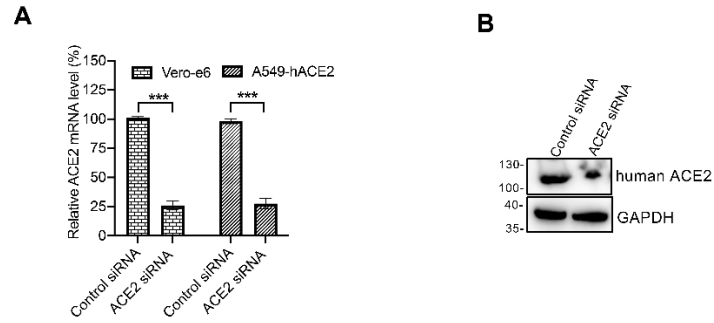

240  
241  
242  
243  
244  
245  
246

**Fig. S2. ACE2 knockdown by ACE2-specific siRNA.** (A) RT-qPCR was used to determine ACE2 knockdown after siRNA transfection in Vero-E6 cells and A549-hACE2 cells for 72 h. The results were representative of three independent experiments. (B) ACE2 knockdown in A549-hACE2 cells was determined by western blot.



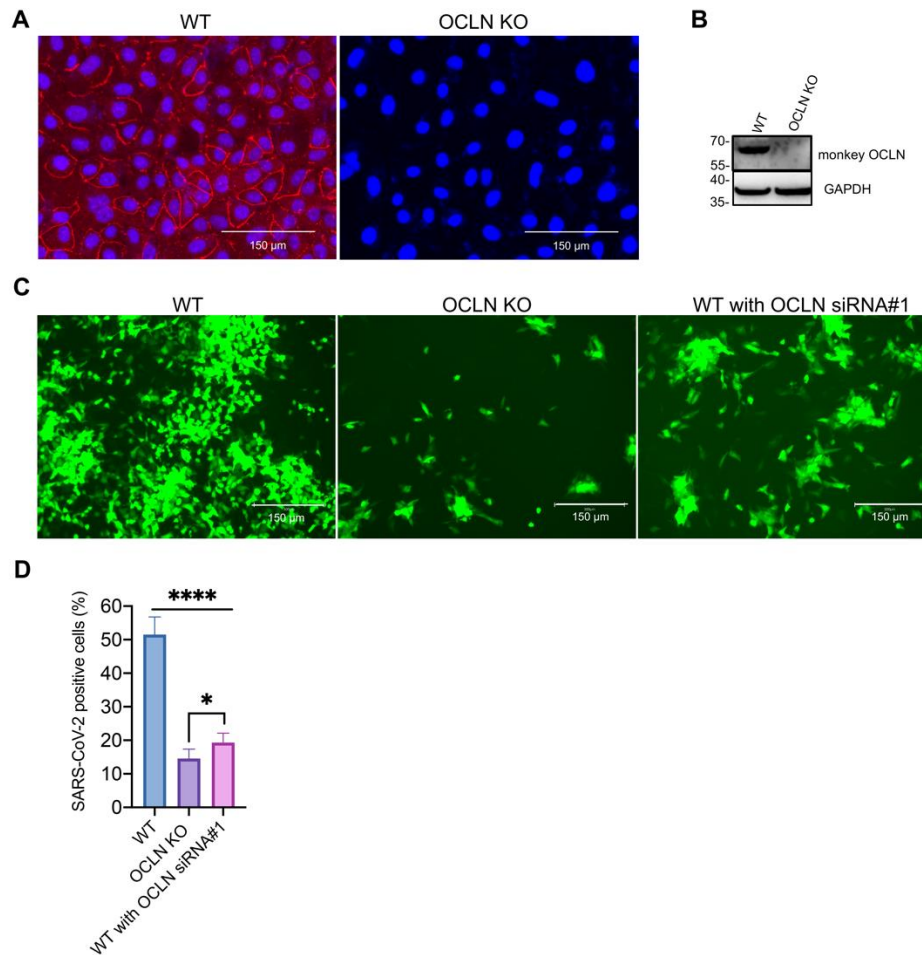

247  
248  
249  
250  
251  
252  
253  
254  
255  
256

**Fig. S3. Generation of Vero-E6 OCLN KO cell line.** (A) OCLN expression was detected by IFA and (B) OCLN KO cells were confirmed by western blot by using an OCLN antibody. Wild type Vero-E6 was used as a positive control (scale bars, 150  $\mu$ m). (C) Wild-type Vero-E6, wild-type Vero-E6 cells transfected with OCLN siRNA#1, and OCLN KO Vero-E6 cells were infected with SARS-CoV-2-mNG virus at an MOI of 0.01. At 24 h postinfection, images were captured (scale bars, 150  $\mu$ m) and (D) Ten different fields for each group were captured and GFP-positive cells were analyzed with ImageJ software.



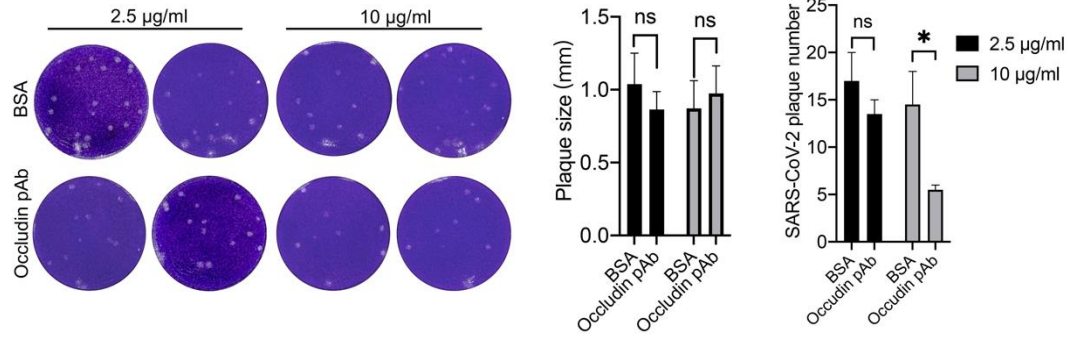

257  
 258  
 259  
 260  
 261  
 262  
 263

**Fig. S4. OCLN polyclonal antibody blocking assay.** Vero-E6 cells were incubated with BSA or an OCLN polyclonal antibody at indicated concentrations at 37°C for 1 h. Then, cells were infected with SARS-CoV-2 at an MOI of 0.001, and plaque assays were performed. Plaque number and plaque size were determined 72 h postinfection. The results were representative of three independent experiments.

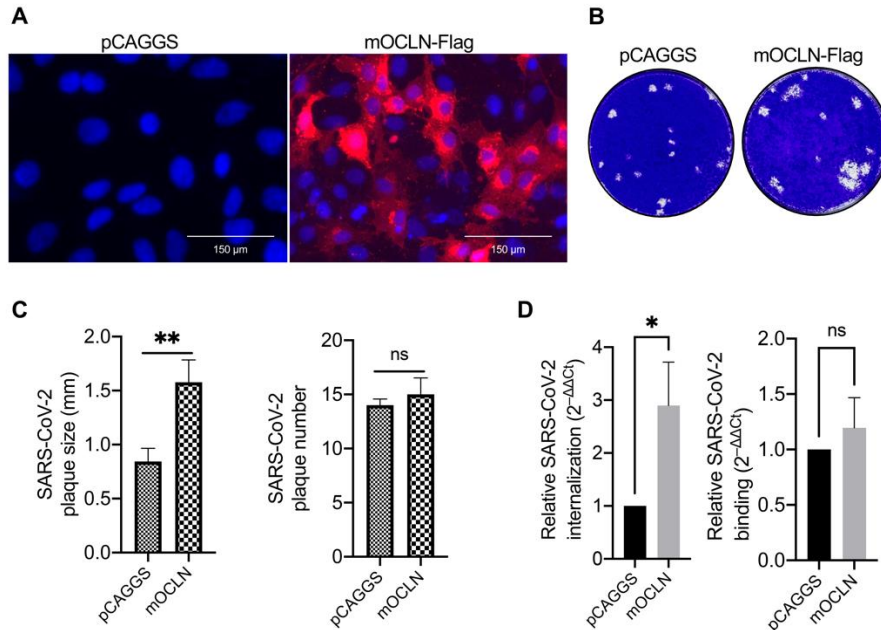

264  
265  
266  
267  
268  
269  
270  
271  
272  
273  
274  
275  
276  
277  
278  
279  
280  
281  
282  
283  
284  
285  
286

**Fig. S5. Expression of mOCLN in Vero-E6 OCLN KO cells increases SARS-CoV-2 cell-to-cell transmission and internalization.** (A) mOCLN was transfected to Vero-E6 OCLN KO cells and its expression production was detected by IFA with an anti-Flag antibody (scale bars, 150  $\mu$ m). (B) Plaque assays were used to determine the effect of mOCLN expression on virus spread by measuring (C) plaque size and plaque number. (D) Virus internalization and virus binding were determined by RT-qPCR after mOCLN expression. The results were representative of three independent experiments.

### Supplementary References

1. M. C. Johnson *et al.*, Optimized Pseudotyping Conditions for the SARS-COV-2 Spike Glycoprotein. *J Virol* **94** (2020).
2. X. Xie *et al.*, An infectious cDNA clone of SARS-CoV-2. *Cell host & microbe* **27**, 841-848. e843 (2020).
3. J. B. Case *et al.*, Neutralizing antibody and soluble ACE2 inhibition of a replication-competent VSV-SARS-CoV-2 and a clinical isolate of SARS-CoV-2. *Cell host & microbe* **28**, 475-485. e475 (2020).
4. S. Liu *et al.*, The second extracellular loop dictates Occludin-mediated HCV entry. *Virology* **407**, 160-170 (2010).
5. J. Wang *et al.*, SARS-CoV-2 uses metabotropic glutamate receptor subtype 2 as an internalization factor to infect cells. *Cell discovery* **7**, 1-16 (2021).
